# Supplementary material
Source: MDPI journal article supplement (https://www.mdpi.com/2072-4292/12/2/286)
Supplement: s1 [file s1]

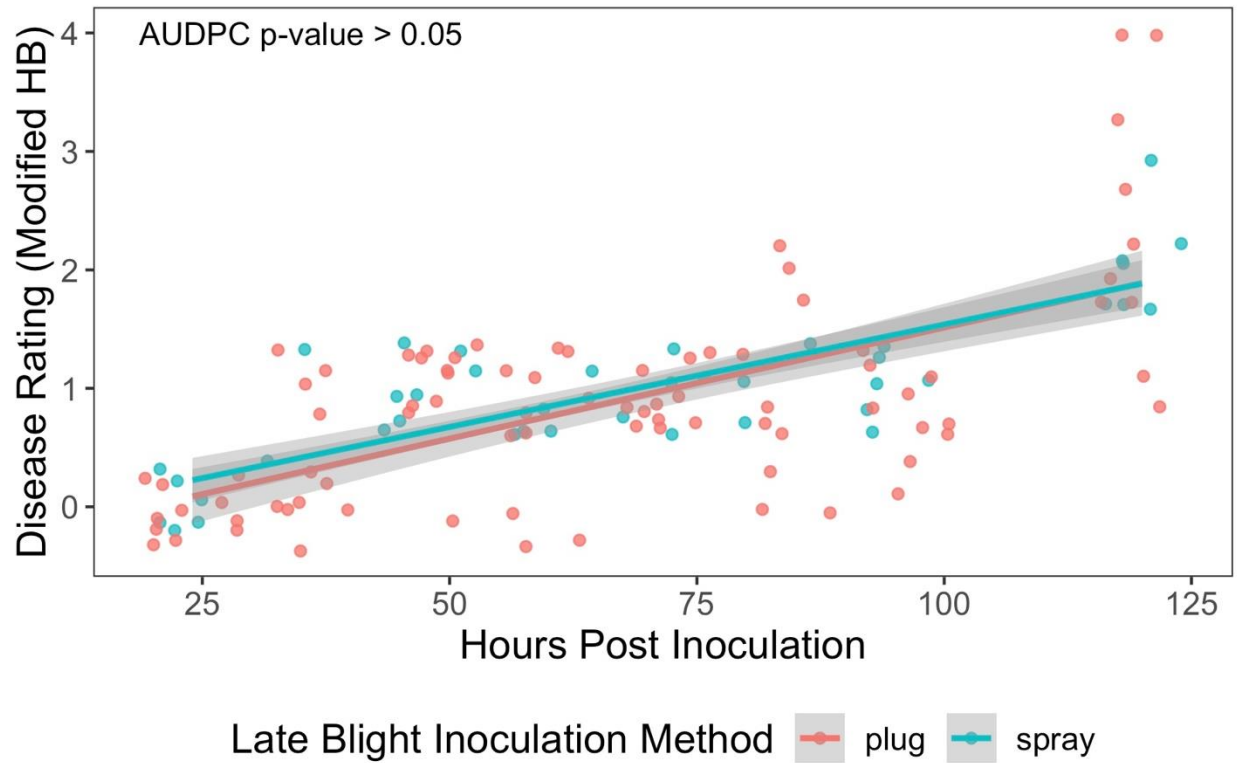

**Figure s1.** Disease progression, as area under the disease progress curve (AUDPC) from serial disease severity ratings (modified Horsfall Barratt Scale), resulting from sporangial suspension application (spray, spectra  $n = 38$ ) and inoculum plug (plug, spectra  $n = 86$ ) *Phytophthora infestans* inoculation methods. AUDPC was not significantly different between the two inoculation methods. Horsfall, J. G.; Barratt, R. W. (1945), "An Improved Grading System for Measuring Plant Disease", *Phytopathology*, **35**: 655–659.

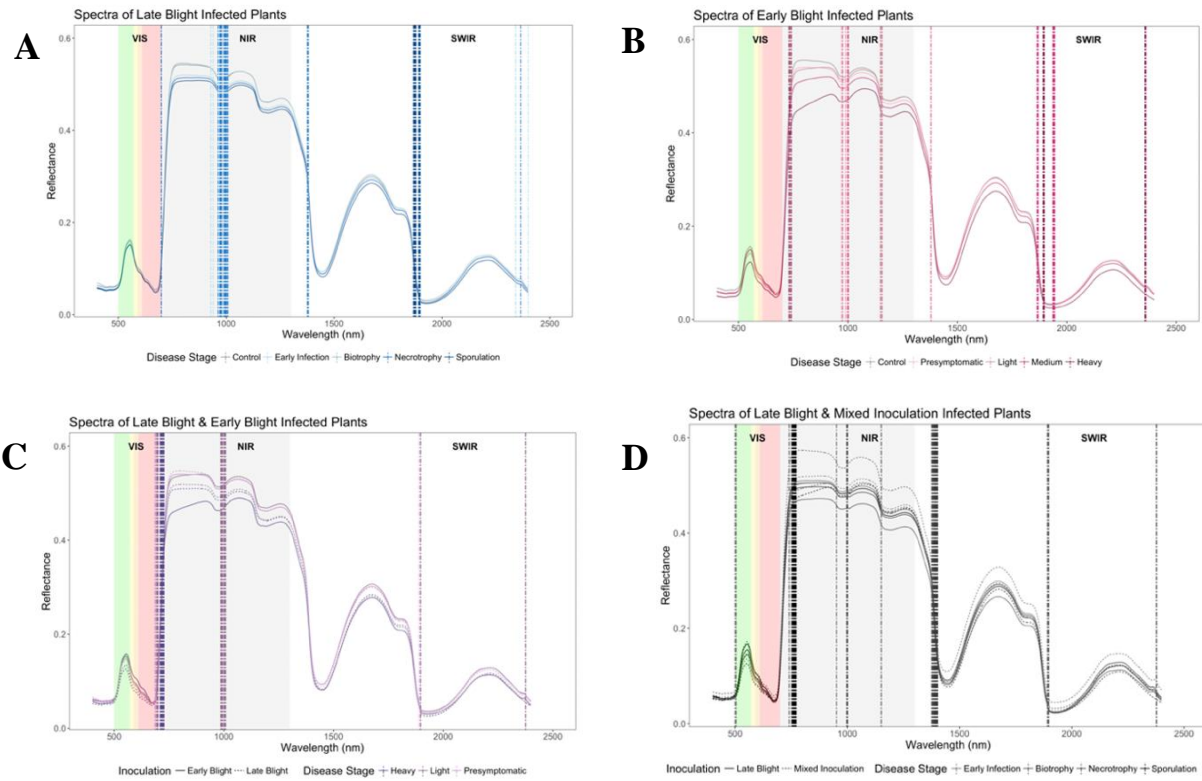

**Figure S2.** Spectra plots annotated with bars indicating top 1% of standard coefficients that are most important to the partial least squares-discriminant analysis (PLS-DA) models by absolute value for each time stage of potato early and late blight disease. **S2A.** Spectra and standardized coefficients from control, early infection, biotrophy, necrotrophy, and sporulation of potato late blight. **S2B.** Spectra and standardized coefficients from control, pre-symptomatic, light, and heavy post-symptomatic stages of potato early blight. **S2C.** Spectra of potato late blight and early blight with standardized coefficients from models differentiating the two diseases at pre-symptomatic time points, light disease time points, and heavy disease time points. **S2D.** Spectra from potato late blight and mixed late blight and early blight diseased leaves with standardized coefficients from models differentiating the two diseases at pre-symptomatic, light infection, and heavy infection time points.

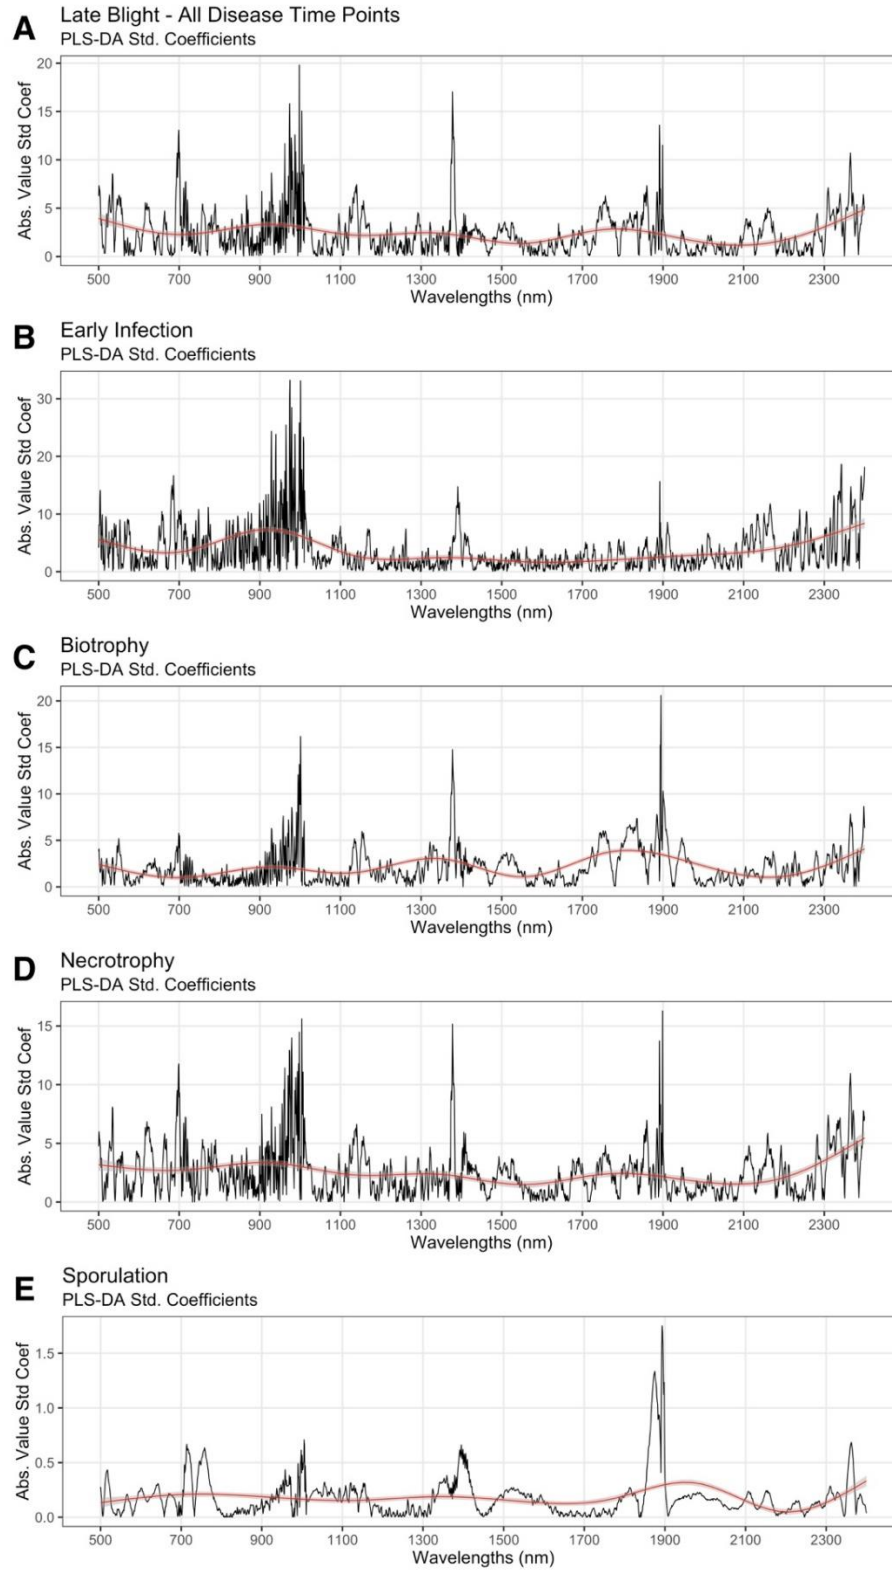

**Figure S3.** Potato late blight vs. non-diseased (control) partial least squares-discriminant analysis (PLS-DA), absolute value standard coefficients for **(A)** all disease time points, **(B)** early infection, **(C)** biotrophy, **(D)** necrotrophy, and **(E)** sporulation.

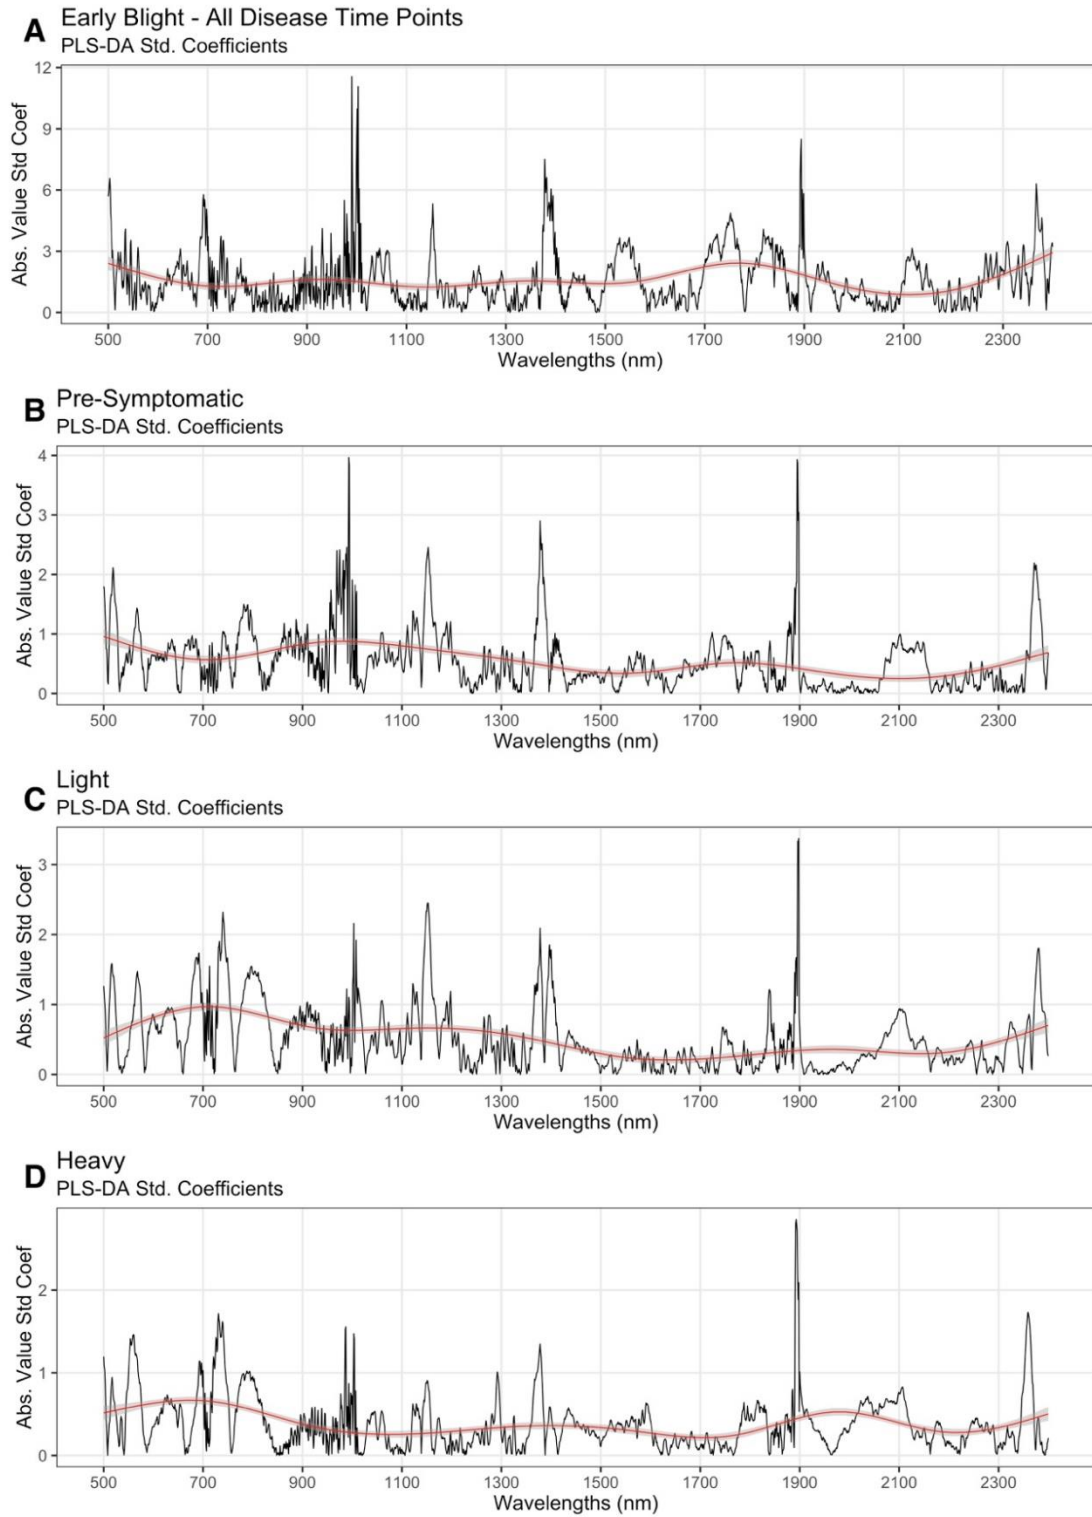

**Figure S4.** Potato early blight partial least squares-discriminant analysis (PLS-DA) absolute value std. coefficient plots for **(A)** all disease time points, **(B)** pre-symptomatic infection, **(C)** light symptomatic infection, and **(D)** heavy symptomatic infection.

**A** Late Blight vs. Early Blight - All Disease Time Points  
PLS-DA Std. Coefficients

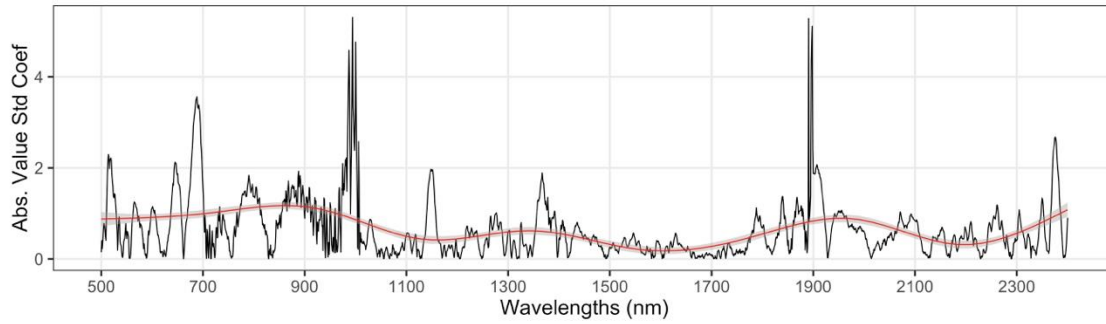

**B** Pre-Symptomatic  
PLS-DA Std. Coefficients

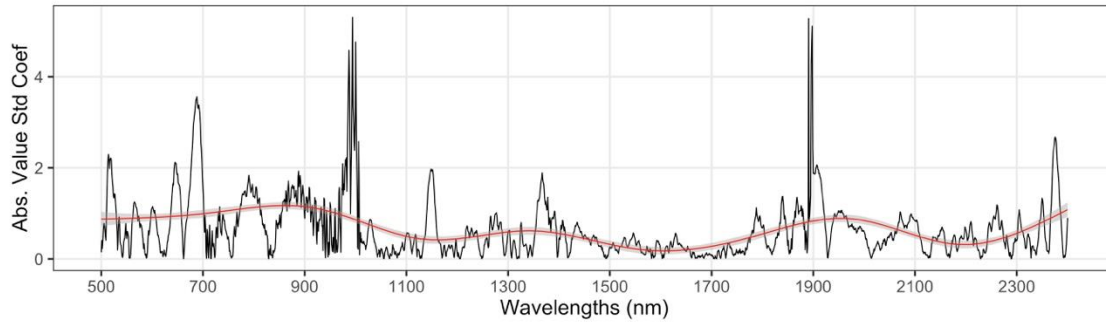

**C** Light  
PLS-DA Std. Coefficients

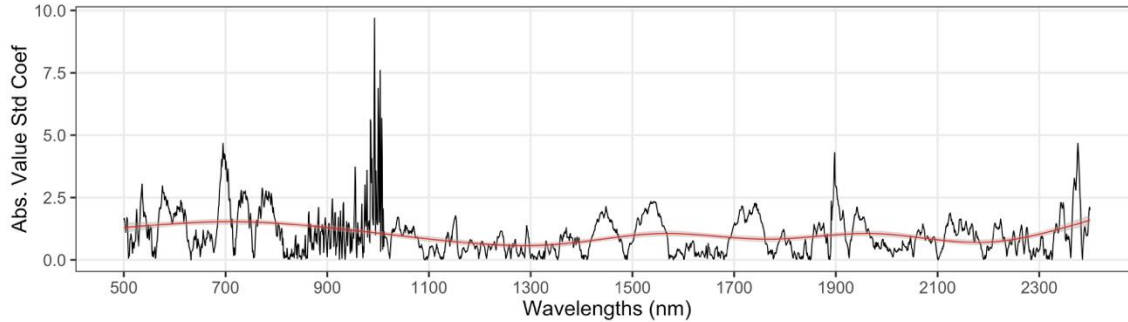

**D** Heavy  
PLS-DA Std. Coefficients

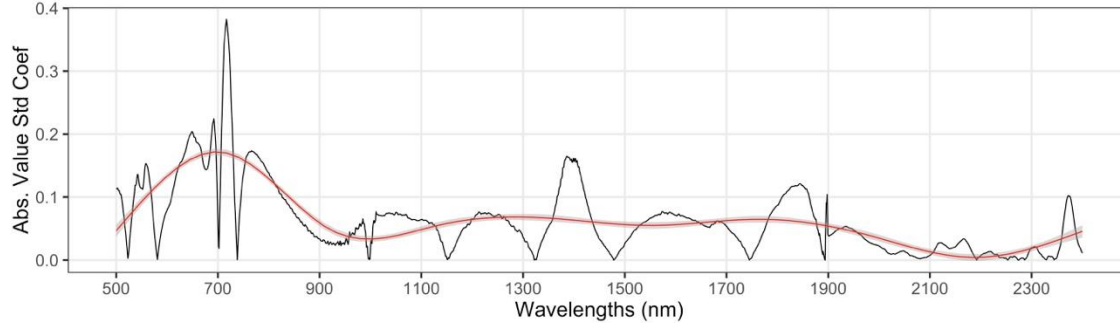

**Figure S5.** Partial least squares-discriminant analysis (PLS-DA) absolute value std. coefficient plots for differentiation between late blight and early blight during **(A)** all disease time points, **(B)** pre-symptomatic infection (early infection and biotrophic late blight), **(C)** light symptomatic infection (necrotrophic late blight), and **(D)** heavy symptomatic infection (sporulation late blight). .

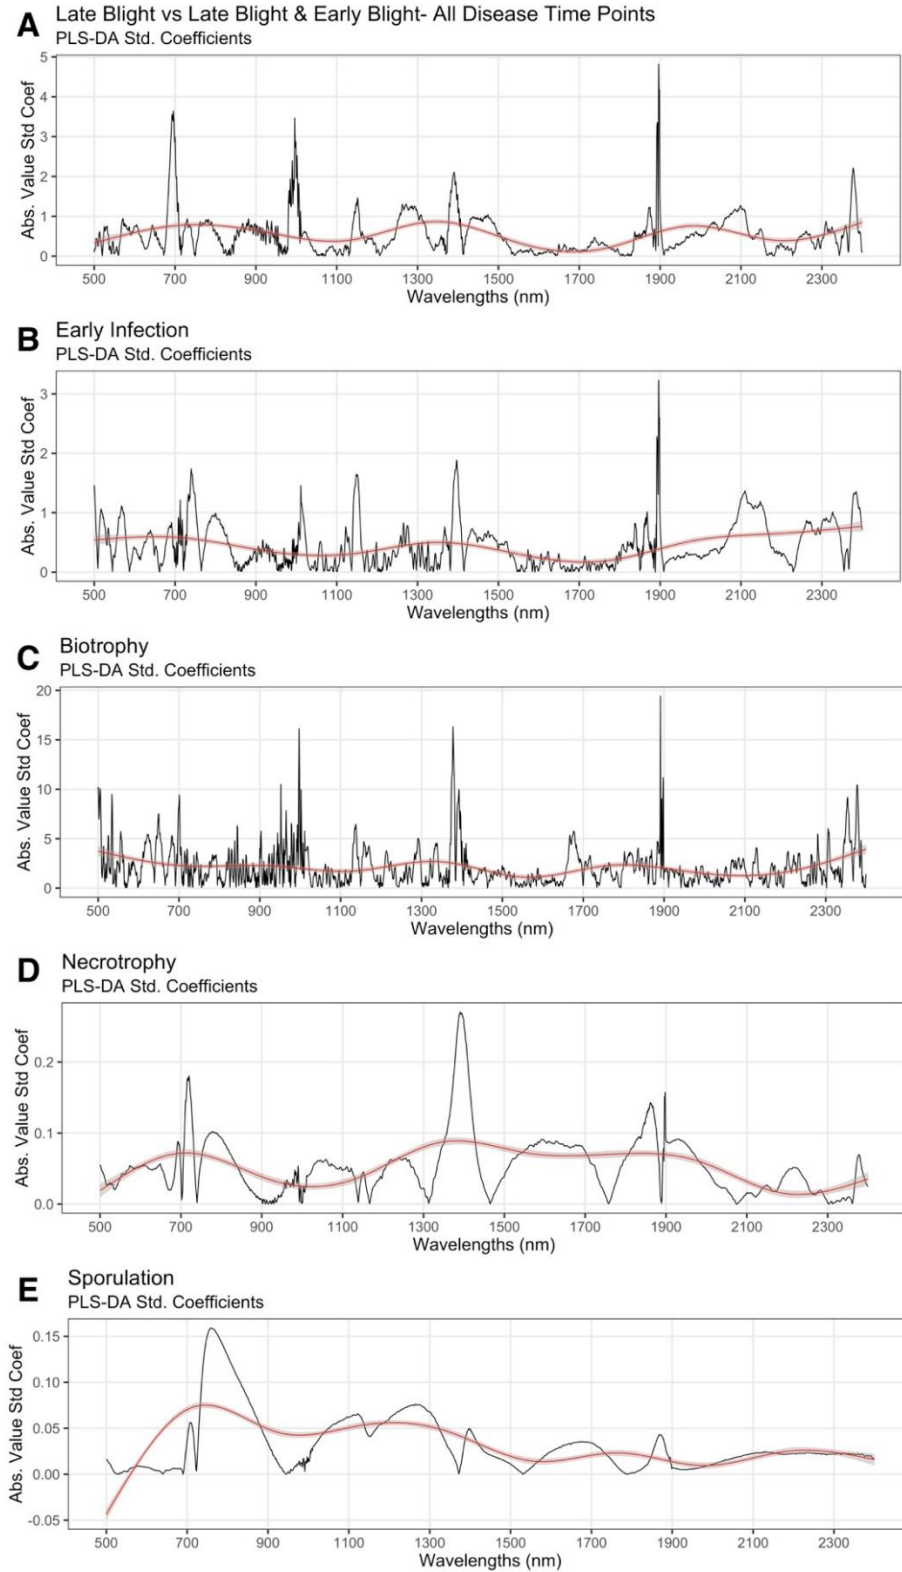

**Figure S6.** – Potato late blight vs. potato late blight and potato early blight (mixed inoculation) partial least squares-discriminant analysis (PLS-DA) absolute value std. coefficient plots **(A)** all disease time points, **(B)** early infection, **(C)** biotrophy, **(D)** necrotrophy, and **(E)** sporulation.

**Table S1.** ANOVA tables for spectrally derived biochemical and physiological trait indices (partial least squares regression, late blight vs. control).

| <b>Non-Destructively Sensed Traits- Late Blight vs. Control</b> |       |       |        |                   |
|-----------------------------------------------------------------|-------|-------|--------|-------------------|
| <i>Data binned by late blight disease time</i>                  |       |       |        |                   |
|                                                                 | numDF | denDF | Fvalue | Pvalue            |
| <b>Total Phenolics</b>                                          |       |       |        |                   |
| Intercept                                                       | 1     | 358   | 3587   | <b>&lt;0.0001</b> |
| Disease Time                                                    | 3     | 358   | 11     | <b>&lt;0.0001</b> |
| Treatment                                                       | 1     | 170   | 17     | <b>&lt;0.0001</b> |
| Disease Time by Treatment                                       | 3     | 358   | 3      | 0.021             |
| <b>Sugars</b>                                                   |       |       |        |                   |
| Intercept                                                       | 1     | 358   | 1416   | <b>&lt;0.0001</b> |
| Disease Time                                                    | 3     | 358   | 14     | <b>&lt;0.0001</b> |
| Treatment                                                       | 1     | 170   | 9      | 0.003             |
| Disease Time by Treatment                                       | 3     | 358   | 1      | 0.265             |
| <b>Starch</b>                                                   |       |       |        |                   |
| Intercept                                                       | 1     | 358   | 5361   | <b>&lt;0.0001</b> |
| Disease Time                                                    | 3     | 358   | 12     | <b>&lt;0.0001</b> |
| Treatment                                                       | 1     | 170   | 2      | 0.177             |
| Disease Time by Treatment                                       | 3     | 358   | 1      | 0.417             |
| <b>Nitrogen</b>                                                 |       |       |        |                   |
| Intercept                                                       | 1     | 358   | 3440   | <b>&lt;0.0001</b> |
| Disease Time                                                    | 3     | 358   | 22     | <b>&lt;0.0001</b> |
| Treatment                                                       | 1     | 170   | 15     | <b>&lt;0.0001</b> |
| Disease Time by Treatment                                       | 3     | 358   | 4      | <b>0.012</b>      |
| <b>Leaf Mass / Area (LMA)</b>                                   |       |       |        |                   |
| Intercept                                                       | 1     | 358   | 3820   | <b>&lt;0.0001</b> |
| Disease Time                                                    | 3     | 358   | 5      | <b>0.001</b>      |
| Treatment                                                       | 1     | 170   | 8      | <b>0.007</b>      |
| Disease Time by Treatment                                       | 3     | 358   | 7      | <b>&lt;0.0001</b> |
| <b>NDWI</b>                                                     |       |       |        |                   |
| Intercept                                                       | 1     | 358   | 17,999 | <b>&lt;0.0001</b> |
| Disease Time                                                    | 3     | 358   | 15     | <b>&lt;0.0001</b> |
| Treatment                                                       | 1     | 170   | 11     | <b>0.001</b>      |
| Disease Time by Treatment                                       | 3     | 358   | 2      | 0.107             |

**Table S2.** ANOVA tables for spectrally derived biochemical and physiological trait indices (partial least squares regression), early blight vs control.

| <b>Non-Destructively Sensed Traits- Early Blight vs. Control</b> |       |       |        |                   |
|------------------------------------------------------------------|-------|-------|--------|-------------------|
| <i>Data binned by early blight disease time</i>                  |       |       |        |                   |
|                                                                  | numDF | denDF | Fvalue | Pvalue            |
| <b>Total Phenolics</b>                                           |       |       |        |                   |
| Intercept                                                        | 1     | 225   | 793    | <b>&lt;0.0001</b> |
| Disease Time                                                     | 2     | 124   | 4      | <b>0.022</b>      |
| Treatment                                                        | 1     | 94    | 7      | <b>0.012</b>      |
| Disease Time by Treatment                                        | 2     | 124   | 9      | <b>&lt;0.0001</b> |
| <b>Sugars</b>                                                    |       |       |        |                   |
| Intercept                                                        | 1     | 225   | 382    | <b>&lt;0.0001</b> |
| Disease Time                                                     | 2     | 124   | 11     | <b>&lt;0.0001</b> |
| Treatment                                                        | 1     | 94    | 2      | 0.212             |
| Disease Time by Treatment                                        | 2     | 124   | 5      | <b>0.007</b>      |
| <b>Starch</b>                                                    |       |       |        |                   |
| Intercept                                                        | 1     | 225   | 1900   | <b>&lt;0.0001</b> |
| Disease Time                                                     | 2     | 124   | 3      | <b>0.051</b>      |
| Treatment                                                        | 1     | 94    | 0      | 0.527             |
| Disease Time by Treatment                                        | 2     | 124   | 7      | <b>0.001</b>      |
| <b>Nitrogen</b>                                                  |       |       |        |                   |
| Intercept                                                        | 1     | 225   | 1449   | <b>&lt;0.0001</b> |
| Disease Time                                                     | 2     | 124   | 20     | <b>&lt;0.0001</b> |
| Treatment                                                        | 1     | 94    | 2      | 0.154             |
| Disease Time by Treatment                                        | 2     | 124   | 6      | 0.003             |
| <b>Leaf Mass / Area (LMA)</b>                                    |       |       |        |                   |
| Intercept                                                        | 1     | 225   | 1714   | <b>&lt;0.0001</b> |
| Disease Time                                                     | 2     | 124   | 7      | <b>0.001</b>      |
| Treatment                                                        | 1     | 94    | 0      | 0.531             |
| Disease Time by Treatment                                        | 2     | 124   | 6      | <b>0.003</b>      |
| <b>NDWI</b>                                                      |       |       |        |                   |
| Intercept                                                        | 1     | 225   | 4,544  | <b>&lt;0.0001</b> |
| Disease Time                                                     | 2     | 124   | 32     | <b>&lt;0.0001</b> |
| Treatment                                                        | 1     | 94    | 27     | <b>&lt;0.0001</b> |
| Disease Time by Treatment                                        | 2     | 124   | 14     | <b>&lt;0.0001</b> |



**Table S3.** ANOVA tables for spectrally derived biochemical and physiological trait indices (partial least squares regression), late blight vs. early blight, binned by early blight disease time stages.

| <b>Non-Destructively Sensed Traits- Early Blight vs. Late Blight</b> |       |       |        |                   |
|----------------------------------------------------------------------|-------|-------|--------|-------------------|
| <i>Data binned by early blight disease time</i>                      |       |       |        |                   |
|                                                                      | numDF | denDF | Fvalue | Pvalue            |
| <b>Total Phenolics</b>                                               |       |       |        |                   |
| Intercept                                                            | 1     | 327   | 1998   | <b>&lt;0.0001</b> |
| Disease Time                                                         | 2     | 215   | 0      | 0.709             |
| Treatment                                                            | 1     | 164   | 0      | 0.498             |
| Disease Time by Treatment                                            | 2     | 215   | 16     | <b>&lt;0.0001</b> |
| <b>Sugars</b>                                                        |       |       |        |                   |
| Intercept                                                            | 1     | 327   | 1258   | <b>&lt;0.0001</b> |
| Disease Time                                                         | 2     | 215   | 9      | <b>&lt;0.0001</b> |
| Treatment                                                            | 1     | 164   | 1      | 0.294             |
| Disease Time by Treatment                                            | 2     | 215   | 10     | <b>&lt;0.0001</b> |
| <b>Starch</b>                                                        |       |       |        |                   |
| Intercept                                                            | 1     | 327   | 3853   | <b>&lt;0.0001</b> |
| Disease Time                                                         | 2     | 215   | 3      | <b>0.04</b>       |
| Treatment                                                            | 1     | 164   | 3      | 0.106             |
| Disease Time by Treatment                                            | 2     | 215   | 5      | <b>0.007</b>      |
| <b>Nitrogen</b>                                                      |       |       |        |                   |
| Intercept                                                            | 1     | 327   | 3564   | <b>&lt;0.0001</b> |
| Disease Time                                                         | 2     | 215   | 16     | <b>&lt;0.0001</b> |
| Treatment                                                            | 1     | 164   | 5      | <b>0.034</b>      |
| Disease Time by Treatment                                            | 2     | 215   | 1      | 0.363             |
| <b>Leaf Mass / Area (LMA)</b>                                        |       |       |        |                   |
| Intercept                                                            | 1     | 327   | 3124   | <b>&lt;0.0001</b> |
| Disease Time                                                         | 2     | 215   | 1      | 0.509             |
| Treatment                                                            | 1     | 164   | 4      | 0.061             |
| Disease Time by Treatment                                            | 2     | 215   | 6      | <b>0.003</b>      |
| <b>NDWI</b>                                                          |       |       |        |                   |
| Intercept                                                            | 1     | 327   | 9,256  | <b>&lt;0.0001</b> |
| Disease Time                                                         | 2     | 215   | 18     | <b>&lt;0.0001</b> |
| Treatment                                                            | 1     | 164   | 25     | <b>&lt;0.0001</b> |
| Disease Time by Treatment                                            | 2     | 215   | 38     | <b>&lt;0.0001</b> |
